# Supplementary material for: Liquiritin Carbomer Gel Cold Paste Promotes Healing of Solar Dermatitis in Mice
Source: MDPI journal article supplement (doi:10.3390/ijms25073767), 2024-03-28
Supplement: s1 [file s1]

## Supplementary Materials

### 1. The structural formula of liquiritin

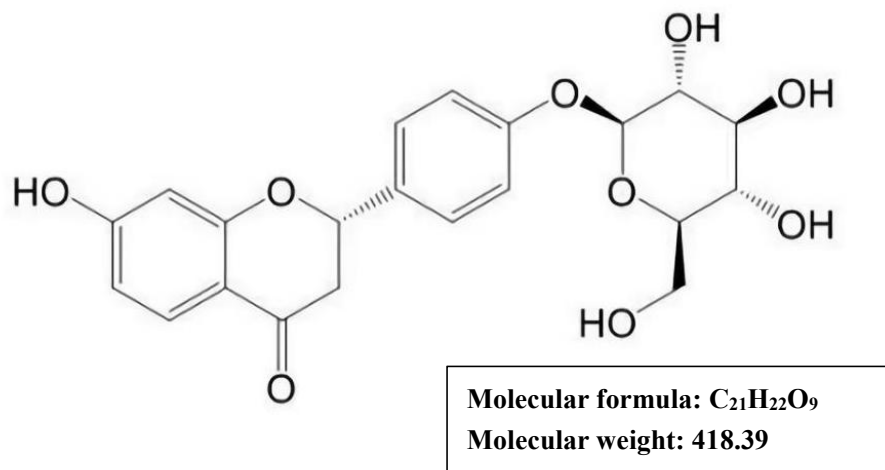

Figure S1. The structural formula of liquiritin

### 2. Effect of 0.1% DMSO on cell viability

To confirm whether 0.1% DMSO would have an effect on the cells, MTT assay was used to detect cell viability. As the result in Figure S2 showed, 0.1% DMSO had no effect on HaCaT and JB6 cells.

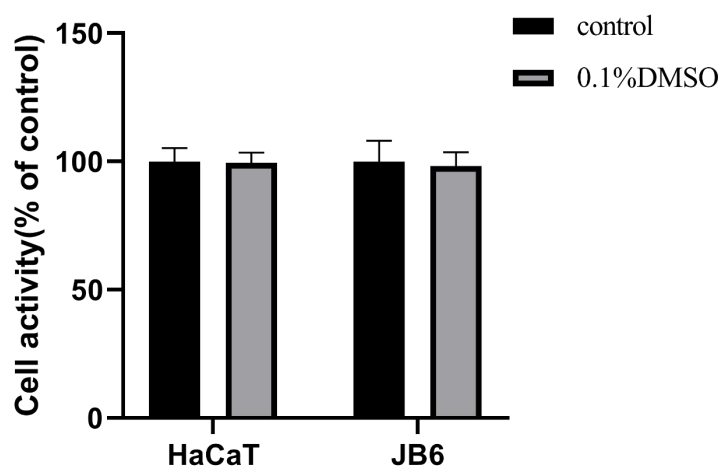

Figure S2. Effect of 0.1% DMSO on cell viability

### 3. Characterization

After preparation of 0.5% LQ-CG, 1% LQ-CG and 2% LQ-CG, the samples were lyophilized in a lyophilizer. Subsequently, gold was sprayed on the surface of the samples, and SEM images were scanned and recorded using a Hitachi SU8100 SEM (Tokyo, Japan) to observe the microstructure of LQ-CG.

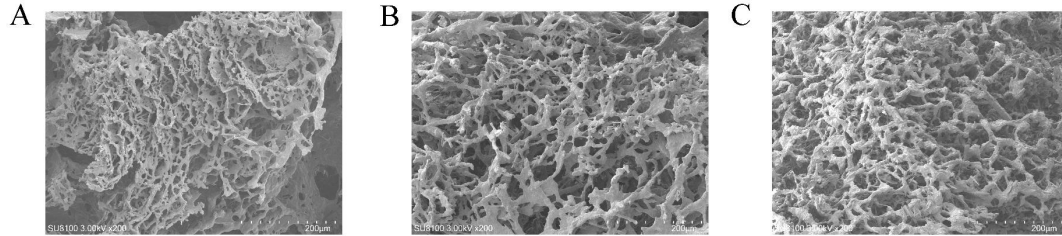

Figure S3. SEM images of LQ-CG. (A) 0.5% LQ-CG; (B) 1% LQ-CG; and (C) 2% LQ-CG

In order to observe the microstructure of LQ-CG, the surface of the hydrogel was observed morphologically by SEM. SEM images show that the LQ-CG pore sizes are similar in size and the pore distribution is uniform. Having a large number of pores and a well-developed three-dimensional structure helps with cell infiltration and promotes the formation of new tissues, which is beneficial for wound healing.

### 4. The study of drug release in vitro

In order to study the release of LQ from LQ-CG, a standard absorbance curve for LQ was established. The calibration curve was  $y = 0.0011x + 0.717$ ,  $R^2 = 0.99$ . The release of LQ-CG in a simulated in vitro environment (pH 7.4 PBS) was determined. Firstly, 1 mL of LQ-CG was prepared, 5 mL of PBS was added and placed at 37°C. At a specific time, 1 mL of PBS was removed and 1 mL of PBS was added and the absorbance of the solution was measured at 276 nm. The cumulative release of drug from LQ-CG was calculated according to the following equation.  $E$  represents the cumulative percent release of LQ-CG.  $V_E$  is the volume of buffer taken out,  $V_0$  is the volume of PBS added initially,  $C_i$  and  $C_n$  represent the concentration of the drug at the  $i$ -th and  $n$ -th hour, and  $M_0$  represents the mass of the drug in the LQ-CG at the time of initial.

$$E (\%) = (V_E \sum_{i=1}^{n-1} C_i + V_0 C_n) / m_0 \times 100\%$$

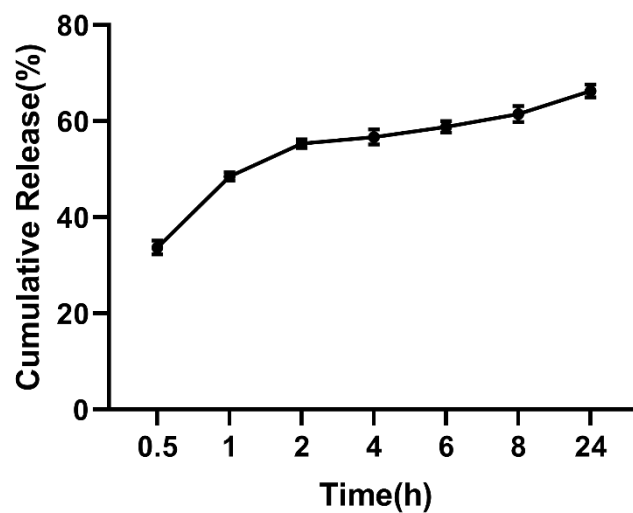

Figure S4. In vitro drug release of LQ-CG

The results of in vitro drug release showed that the total cumulative release of LQ reached 55.34% at 4 h, after which the release rate slowed down to a cumulative release of 66.3% at 24 h.
